# Supplementary material for: Sacroiliac joint radiographic progression in axial spondyloarthritis is retarded by the therapeutic use of TNF inhibitors: 12-year data from the SCQM registry
Source: PubMed Central journal article supplement — RMD Open. 2022 Oct 21;8(2):e002551. doi: 10.1136/rmdopen-2022-002551 (PMC9594572; doi:10.1136/rmdopen-2022-002551), 2022-10-21
Supplement: rmdopen-2022-002551supp001.pdf [file rmdopen-2022-002551supp001.pdf]

## Supplementary Appendix

### Progression of radiographic sacroiliitis in axial spondyloarthritis is retarded by the therapeutic use of TNF inhibitors: 12-year data from the SCQM registry

**Table S1. Characteristics at inclusion of all patients fulfilling the ASAS classification criteria in SCQM**

| Parameter                   | All patients |                |
|-----------------------------|--------------|----------------|
|                             | N=3050       |                |
| Male sex, N (%)             | 3050         | 1796 (58.9)    |
| HLA-B27 positive, N (%)     | 3050         | 2362 (77.4)    |
| nr-axSpA, N (%)             | 1770         | 470 (26.6)     |
| Age, years                  | 3050         | 39.0 (11.4)    |
| Symptom duration, years     | 2988         | 12.4 (11.1)    |
| BASDAI                      | 2436         | 4.6 (2.3)      |
| ASDAS                       | 2195         | 2.9 (1.1)      |
| CRP, mg/l, median (IQR)     | 2744         | 5.0 (1.2; 8.0) |
| BASFI                       | 2451         | 3.1 (2.5)      |
| BASMI                       | 2753         | 1.9 (1.9)      |
| Current enthesitis, N (%)   | 2931         | 1843 (62.9)    |
| BMI 25-30, %                | 2830         | 875 (30.9)     |
| BMI >30, %                  | 2830         | 435 (15.4)     |
| On NSAID treatment, N (%)   | 2810         | 2402 (85.5)    |
| On csDMARD treatment, N (%) | 3050         | 332 (10.9)     |
| On TNFi treatment, N (%)    | 3050         | 796 (26.1)     |
| Current smokers, N (%)      | 2388         | 855 (35.8)     |

Except where indicated otherwise, values are the mean (SD). ASDAS = Ankylosing Spondylitis Disease Activity Score; BASDAI = Bath Ankylosing Spondylitis Disease Activity Index; BASFI = Bath Ankylosing Spondylitis Functional Index; BASMI = Bath Ankylosing Spondylitis Metrology Index; BMI = Body Mass Index; CRP = C-reactive protein (CRP) levels; csDMARD = conventional synthetic disease-modifying anti-rheumatic drug; HLA-B27 = human leucocyte antigen B27; mSASSS = modified Stoke Ankylosing Spondylitis Spine Score; nr-axSpA = nonradiographic axial spondyloarthritis (central consensus scoring in database); NSAID = Nonsteroidal anti-inflammatory drug; SSS = Sacroiliitis Sum Score; TNFi = Tumour necrosis factor inhibitor.

**Table S2.** Sacroiliac joint progression over 2 years as observed by reader 1 and reader 2 and defined as a change of at least 1 grade in at least one SIJ and ignoring a change from 0 to 1.

|          |                | Reader 1       |             |
|----------|----------------|----------------|-------------|
|          |                | No progression | Progression |
| Reader 2 | No progression | 509            | 92          |
|          | Progression    | 78             | 24          |

**Table S3.** Sensitivity analysis including an interaction term between treatment with TNFi and treatment with NSAIDs in the multivariable analysis for identification of factors associated with radiographic SIJ progression defined as a change of at least 1 grade in at least one SIJ and ignoring a change from 0 to 1 over 2 years.

| Variable                                                         | OR          | 95% CI            | P value     |
|------------------------------------------------------------------|-------------|-------------------|-------------|
| Prior TNFi use up to the start of x-ray interval yes/no          | 0.70        | 0.04; 11.3        | 0.80        |
| Baseline sacroiliac damage (0-7) at start of each x-ray interval | <b>1.33</b> | <b>1.01; 1.75</b> | <b>0.04</b> |
| Female sex                                                       | <b>0.27</b> | <b>0.08; 0.97</b> | <b>0.04</b> |
| Symptom duration                                                 | <b>1.06</b> | <b>1.01; 1.11</b> | <b>0.01</b> |
| Current smoking                                                  | 2.58        | 0.76; 8.75        | 0.13        |
| HLA-B27 negative                                                 | 0.84        | 0.17; 4.15        | 0.83        |
| NSAID use at start of each x-ray interval                        | 1.99        | 0.18; 21.7        | 0.57        |
| ASDAS at start of each x-ray interval                            | 1.08        | 0.61; 1.91        | 0.78        |
| Interaction TNFi use and NSAID use at start of x-ray interval    | 0.19        | 0.01; 4.41        | 0.30        |

Analysis in 302 patients and 483 x-ray intervals (22 events). ASDAS = Ankylosing Spondylitis Disease Activity Score; HLA-B27 = human leucocyte antigen B27; NSAID = Nonsteroidal anti-inflammatory drug; SIJ = sacroiliac joint; TNFi = Tumour necrosis factor inhibitor.

**Table S4.** Impact of an alternative variable choice for prior TNFi use (number of years of TNFi use) on sacroiliac joint radiographic progression defined as a change of at least 1 grade in at least one SIJ and ignoring a change from 0 to 1 over 2 years.

| Variable                                                         | OR          | 95% CI            | P value     |
|------------------------------------------------------------------|-------------|-------------------|-------------|
| Number of years of TNFi use prior to x-ray interval              | 0.84        | 0.66; 1.07        | 0.15        |
| Baseline sacroiliac damage (0-7) at start of each x-ray interval | 1.31        | 1.00; 1.73        | 0.05        |
| Female sex                                                       | 0.30        | 0.08; 1.17        | 0.08        |
| Symptom duration                                                 | <b>1.06</b> | <b>1.01; 1.10</b> | <b>0.02</b> |
| Current smoking                                                  | 2.34        | 0.73; 7.54        | 0.15        |
| HLA-B27 negative                                                 | 0.72        | 0.15; 3.34        | 0.67        |
| NSAID use at start of each x-ray interval                        | 1.16        | 0.32; 4.17        | 0.83        |
| ASDAS at start of each x-ray interval                            | 1.11        | 0.67; 1.85        | 0.67        |

Analysis in 302 patients and 483 x-ray intervals (22 events). ASDAS = Ankylosing Spondylitis Disease Activity Score; HLA-B27 = human leucocyte antigen B27; NSAID = Nonsteroidal anti-inflammatory drug; SIJ = sacroiliac joint; TNFi = Tumour necrosis factor inhibitor.

**Table S5.** Impact of TNFi use during the current x-ray interval in a multivariable analysis for identification of factors associated with radiographic SIJ progression defined as a change in the Sacroiliitis Sum Score over 2 years.

| Variable                                                                        | Estimate      | 95% CI                |
|---------------------------------------------------------------------------------|---------------|-----------------------|
| TNFi use during x-ray interval $\geq$ 1 year (Ref: no TNFi use during interval) | <b>-0.137</b> | <b>-0.237; -0.036</b> |
| TNFi use during x-ray interval $<$ 1 year (Ref: no TNFi use during interval)    | <b>-0.201</b> | <b>-0.342; -0.060</b> |
| Baseline sacroiliac damage (0-7) at start of each x-ray interval                | -0.019        | -0.045; 0.006         |
| Female sex                                                                      | -0.081        | -0.170; 0.009         |
| Symptom duration                                                                | 0.001         | -0.004; 0.004         |
| Current smoking                                                                 | 0.085         | -0.002; 0.171         |
| HLA-B27 negative                                                                | 0.073         | -0.049; 0.195         |
| NSAID use at start of each x-ray interval                                       | 0.021         | -0.114; 0.072         |
| ASDAS at start of each x-ray interval                                           | 0.033         | -0.013; 0.078         |

Analysis in 302 patients and 483 x-ray intervals (22 events). ASDAS = Ankylosing Spondylitis Disease Activity Score; BASDAI = Bath Ankylosing Spondylitis Disease Activity Index; CRP = C-reactive protein; HLA-B27 = human leucocyte antigen B27; NSAID = Nonsteroidal anti-inflammatory drug; SIJ = sacroiliac joint; TNFi = Tumour necrosis factor inhibitor.
